# Supplementary material for: Vertically-grown Ag nanoplates on SeZnO3 nanosheets for an enhanced pressure sensing performance
Source: Royal Society of Chemistry journal article supplement (doi:10.1039/d3sd00130j), 2023-11-21
Supplement: d3sd00130j1.pdf [file d3sd00130j1.pdf]

## Supplementary Information

### **Vertical grown Ag nanoplates on SeZnO<sub>3</sub> nanosheets for enhanced pressure sensing properties**

Zeyi Wang<sup>a</sup>, Yuping Li<sup>a</sup>, Jian Zhang<sup>\*a</sup>, and Xiao Huang<sup>\*a</sup>

a. Institute of Advanced Materials (IAM), School of Flexible Electronics (SoFE), Jiangsu National Synergetic Innovation Center for Advanced Materials (SICAM), Nanjing Tech University (NanjingTech), 30 South Puzhu Road, Nanjing 211816, China.

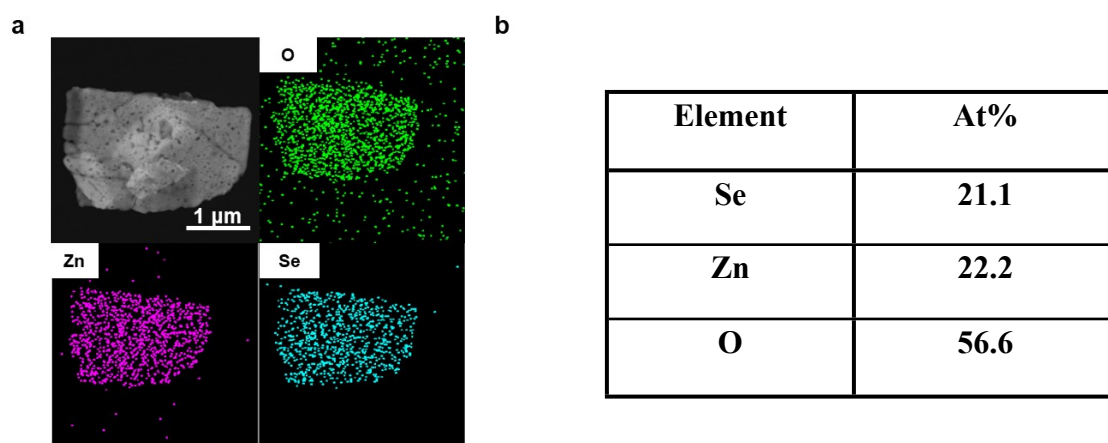

**Fig. S1.** (a) EDS mapping and (b) the stoichiometric composition of  $\text{SeZnO}_3$  nanosheet.

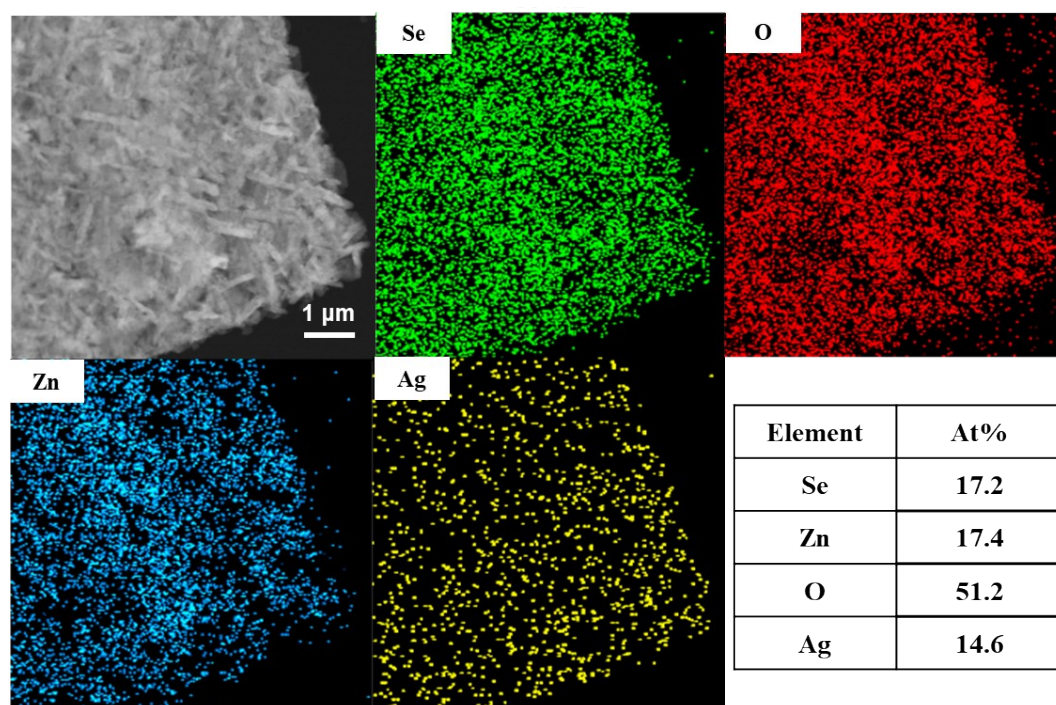

**Fig. S2.** EDS mapping and the stoichiometric composition of  $\text{Ag/SeZnO}_3$  nanosheet.

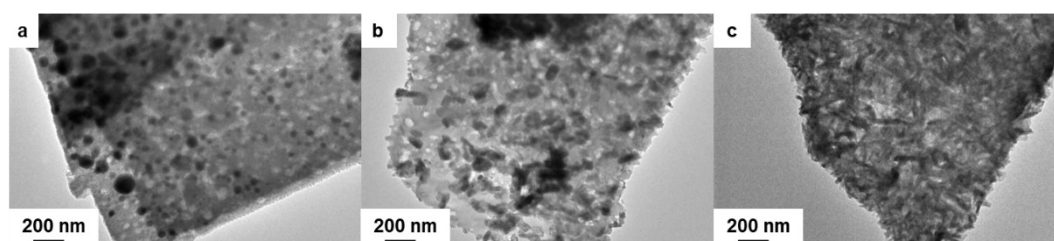

**Fig. S3.** TEM images of  $\text{Ag/SeZnO}_3$  with concentrations of  $\text{AgNO}_3$  is (a) 0.03 mol/L, (b) 0.06 mol/L and (c) 0.18 mol/L.

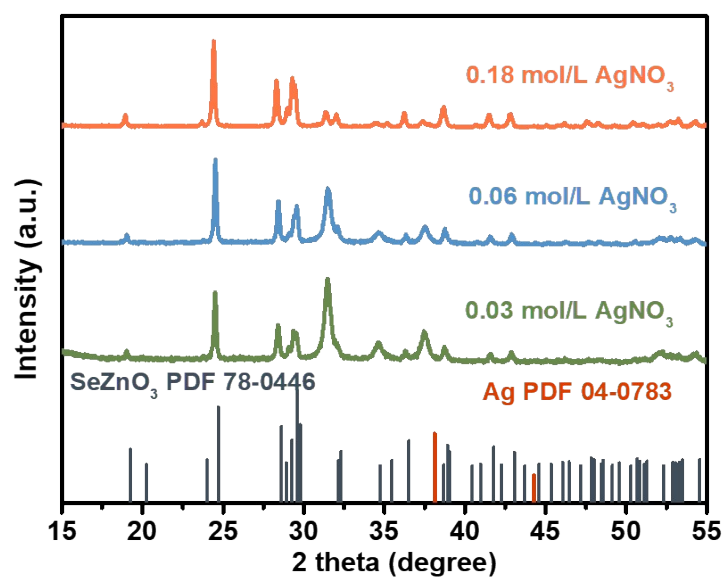

**Fig. S4.** XRD patterns of Ag/SeZnO<sub>3</sub> with concentrations of AgNO<sub>3</sub> is 0.03 mol/L, 0.06 mol/L and 0.18 mol/L.

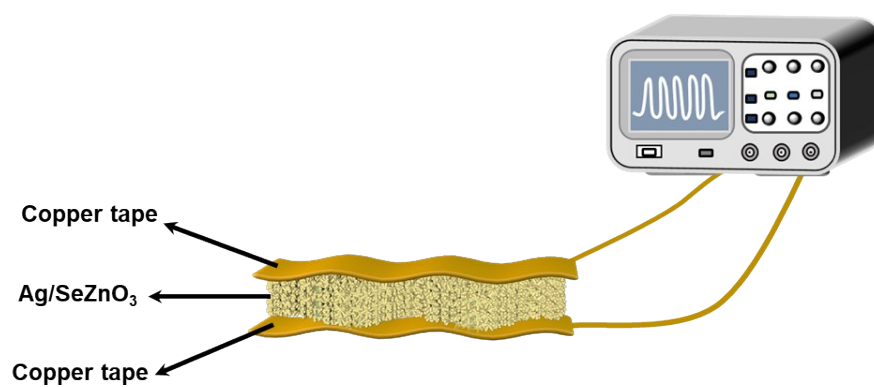

**Fig. S5.** Schematic illustration of pressure sensing performance test.
